# Supplementary material
Source: MDPI journal article supplement (https://www.mdpi.com/2072-4292/16/5/850)
Supplement: s1 [file s1]

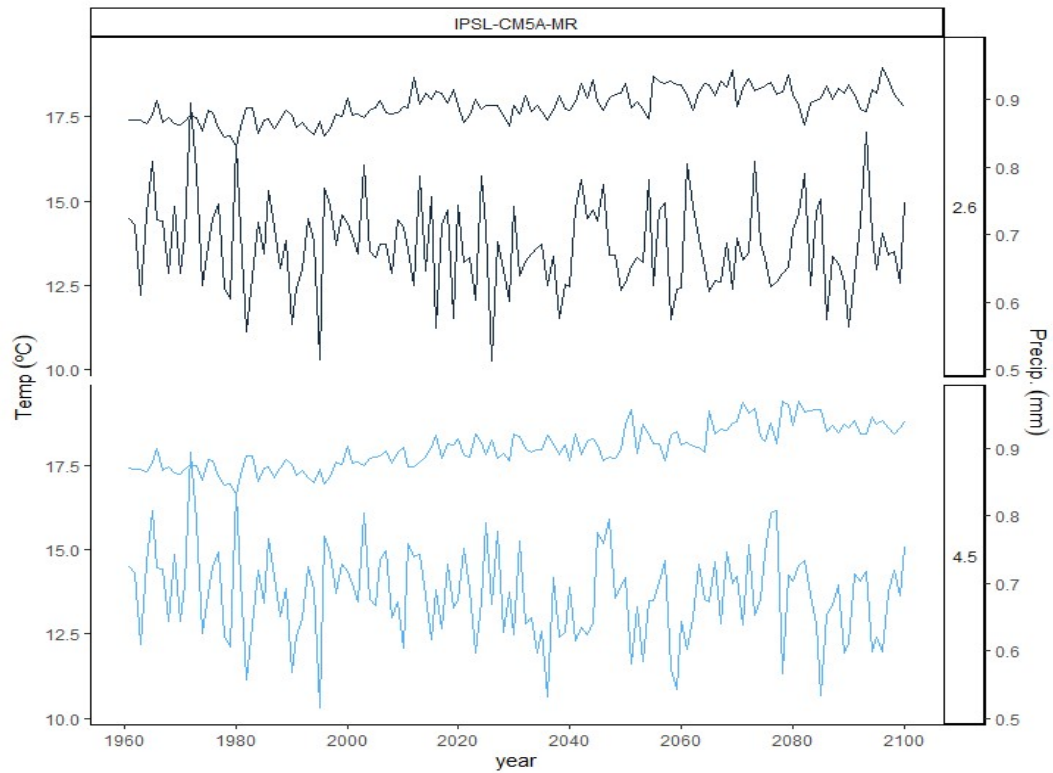

**Figure S1.** Global climate models (CMIP5) projections derived from model IPSL.CM5-MR across two RCP scenarios (2.6 and 4.5) of *Pinus canariensis* stands at Tenerife (Canarian Islands, Spain). Abbreviations: Prcp (precipitation, mm)-descendant trend, Temp (mean temperature, °C)-ascendant trend.

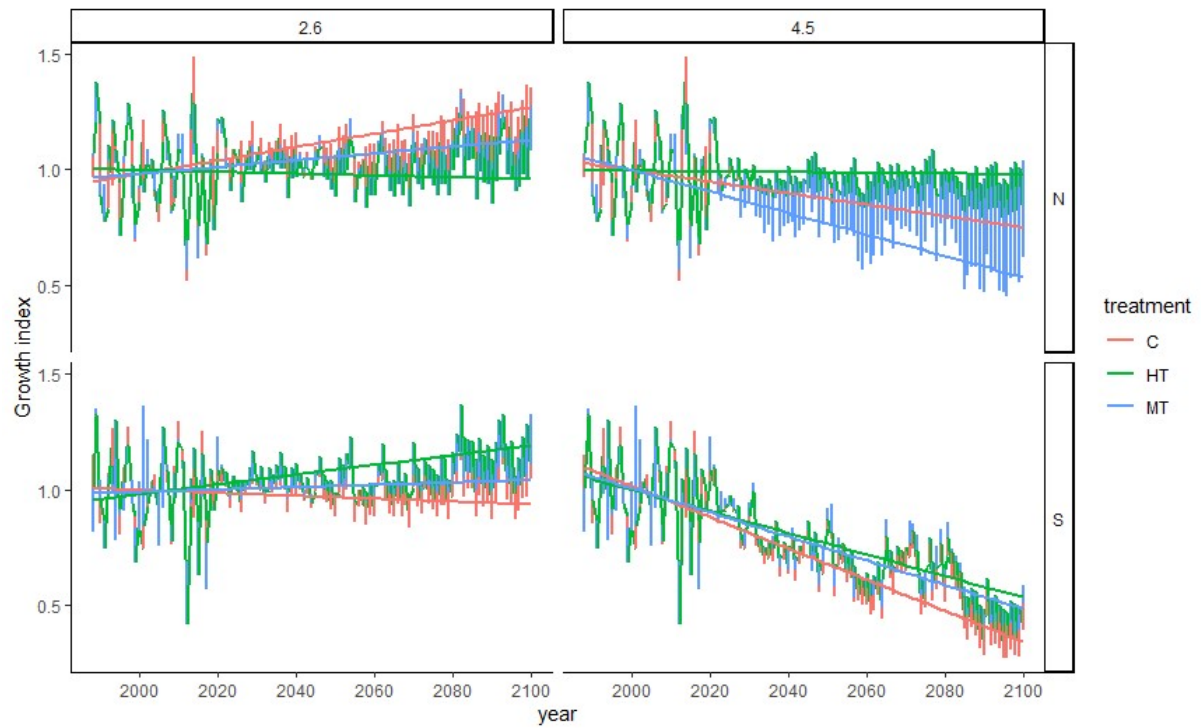

**Figure S2.** Growth index models and future projections of standardised master chronologies of *Pinus canariensis*, climatic growth models calibrated on the past, used to forecast growth according to climatic scenarios (RCP 2.6 and 4.5) and IPSL-CM5-MR model within CMIP5 at Tenerife (Canarian Islands, Spain). Asterisks indicate significant slopes of the regression lines (\*  $p < 0.5$ , \*\*  $p < 0.01$ , \*\*\*  $p < 0.001$ ).

**Table S1.** Forest attribute of the forest types at Tenerife (Canarian Islands, Spain). The study area corresponds to the Pure Canarian pine type. Abbreviations: W=above ground biomass, H=average height, N=tree density, G=basal area, dbh=diameter at breast height, and Fcc=tree cover. Values are means  $\pm$  Standard error (in brackets). Source Spanish National Forest Inventory [34].

| Forest type                             |              | W (Mg ha <sup>-1</sup> ) | H (m)        | N (trees ha <sup>-1</sup> ) | G (m <sup>2</sup> ha) | dbh (cm)     | Fcc (%)      |
|-----------------------------------------|--------------|--------------------------|--------------|-----------------------------|-----------------------|--------------|--------------|
| <b>Fayal-Brezal</b>                     | Windward (N) | 161.24 (20.42)           | 18.60 (0.99) | 453.59 (18.60)              | 28.89 (2.65)          | 30.11 (0.37) | 78.41 (5.17) |
|                                         | Leeward (S)  | 144.09 (8.58)            | 18.29 (0.65) | 369.34 (20.16)              | 23.76 (1.34)          | 29.11 (0.65) | 74.24 (2.55) |
| <b>Mixed Canarian pine-Fayal-Brezal</b> | Windward (N) | 169.61 (27.08)           | 18.27 (2.32) | 314.84 (42.01)              | 22.13 (4.42)          | 27.33 (2.09) | 67.50 (4.58) |
|                                         | Leeward (S)  | 134.93 (2.03)            | 17.99 (0.17) | 342.74 (4.45)               | 21.95 (0.36)          | 27.89 (0.15) | 73.57 (0.74) |
| <b>Pure Canarian pine</b>               | Windward (N) | 124.62 (3.04)            | 16.44 (0.25) | 359.50 (6.80)               | 21.22 (0.55)          | 26.35 (0.23) | 70.13 (1.15) |
|                                         | Leeward (S)  |                          |              |                             |                       |              |              |

**Table S2.** Selected LiDAR metrics parameters to run statistical analyses [46].

| <b>Abbreviation</b>      | <b>LiDAR metric</b>                                                 |
|--------------------------|---------------------------------------------------------------------|
| Elev.minimum             | Minimum elevation from all returns of the plot                      |
| Elev.maximum             | Maximum elevation from all returns of the plot                      |
| Elev.mean                | Mean elevation from all returns of the plot                         |
| Elev.mode                | Mode elevation from all returns of the plot                         |
| Elev.stddev              | Standard deviation of elevations within the plot                    |
| Elev.variance            | Variance of elevations within the plot                              |
| Elev.CV                  | Coefficient of variation of elevations within the plot              |
| Elev.IQ                  | Interquartile distance of elevations within the plot                |
| Elev.skewness            | Skewness of the elevation from all returns of the plot              |
| Elev.kurtosis            | Kurtosis of the elevation from all returns of the plot              |
| Elev.L1                  | First L-moment of the return heights of the plot                    |
| Elev.L2                  | Second L-moment of the return heights of the plot                   |
| Elev.L4                  | Third L-moment of the return heights of the plot                    |
| Elev.L.CV                | L-moment coefficient of variation of the return heights of the plot |
| Elev.L.skewness          | L-moment skewness of the return heights of the plot                 |
| Elev.L.kurtosis          | L-moment kurtosis of the return heights of the plot                 |
| Elev.P50                 | 50th percentile of the return heights of the plot                   |
| Elev.P60                 | 60th percentile of the return heights of the plot                   |
| Elev.P70                 | 70th percentile of the return heights of the plot                   |
| Elev.P75                 | 75th percentile of the return heights of the plot                   |
| Elev.P80                 | 80th percentile of the return heights of the plot                   |
| Elev.P90                 | 90th percentile of the return heights of the plot                   |
| Elev.P95                 | 95th percentile of the return heights of the plot                   |
| Elev.P99                 | 99th percentile of the return heights of the plot                   |
| Canopy.relief.ratio      | (mean height- min height) / (max height – min height)               |
| First.returns.above.mean | Number of first returns above the mean height of the plot           |
| First.returns.above.mode | Number of first returns above the mode height of the plot           |

**Table S3.** LiDAR models to estimate Basal area ( $G$ ,  $\text{m}^2 \text{ha}^{-1}$ ), Quadratic mean diameter ( $D_g$ ,  $\text{cm}$ ), and Weibull's diameter distribution used for forest attribute inventory [43]. See table S2 for LiDAR metrics.

| Equations for inventory data update                                                                                                     | MAE(%) | MSE(%) |
|-----------------------------------------------------------------------------------------------------------------------------------------|--------|--------|
| $G_i = 0.49833 * LFCC^{0.63396} * Elev.stddev^{-0.588}$<br>$* Elev.P70^{0.92804}$                                                       | 8.25   | 26.07  |
| $D_g = 3.041193 * Elev.P95^{0.67693} * ABS(Int.L.skewness)^{-0.0731}$<br>$* ABS(Elev.L4)^{-0.0494}$                                     | 2.62   | 11.71  |
| $f(x/a, b) = \frac{b}{a} \left(\frac{x}{a}\right) \left(\frac{x}{a}\right)^{b-1} e^{-\left(\frac{x}{a}\right)^b}$<br>$a=29.72 \ b=4.17$ |        |        |
| $a = 7.04692 * Elev.95^{2.552} * Int.kurtosis^{-0.5889} * Elev.90^{-1.9334}$                                                            | 9.90   | 12.31  |
| $b = 6.43778 * (Elev.P75 - Elev.P40)^{-0.37467}$                                                                                        | 21.61  | 28.60  |

**Table S4.** General characteristics of the *Pinus canariensis* stands at Tenerife (Canarian Islands, Spain) after thinning interventions. H=average height, N=tree density, G=basal area, dbh=diameter at breast height, and Fcc=tree cover. Values are means  $\pm$  Standard error (in brackets)

| Specie                                   | Treat | N (tree ha <sup>-1</sup> ) | dbh (cm)     | H (m)        | G (m <sup>2</sup> ha <sup>-1</sup> ) | dbh (cm)     | H (m)        | N (tree ha <sup>-1</sup> ) | dbh (cm)     | H (m)        |
|------------------------------------------|-------|----------------------------|--------------|--------------|--------------------------------------|--------------|--------------|----------------------------|--------------|--------------|
| Post thinning (1988)                     |       |                            |              |              | Post thinning (1995)                 |              |              | Post thinning 2022         |              |              |
| <i>Pinus canariensis</i><br>Windward (N) | C     | 1099 (122)                 | 26.13 (1.75) | 17.40 (1.93) | 62.00 (3.72)                         | 28.33 (1.43) | 18.97 (1.69) | 1056 (93)                  | 33.45 (2.66) | 26.73 (2.23) |
|                                          | MT    | 741 (147)                  | 29.41 (2.71) | 19.30 (1.82) | 52.11 (2.91)                         | 32.11 (2.07) | 20.23 (2.11) | 656 (52)                   | 34.96 (2.59) | 31.43 (3.02) |
|                                          | HT    | 357 (10)                   | 30.27 (1.86) | 17.10 (1.71) | 26.32 (2.06)                         | 34.04 (1.89) | 19.49 (1.92) | 288 (9)                    | 42.22 (2.94) | 28.46 (2.45) |
| <i>Pinus canariensis</i><br>Leeward (S)  | C     | 1781 (397)                 | 21.86 (1.65) | 14.64 (1.75) | 65.71 (3.88)                         | 22.96 (1.67) | 16.91 (1.05) | 1245 (247)                 | 26.91 (2.07) | 25.30 (2.99) |
|                                          | MT    | 1285 (72)                  | 22.40 (1.82) | 14.44 (1.71) | 50.64 (2.94)                         | 22.90 (1.73) | 16.29 (1.27) | 1192 (64)                  | 25.74 (2.83) | 23.06 (2.03) |
|                                          | HT    | 624(152)                   | 24.64 (1.93) | 15.44 (1.76) | 28.79 (1.96)                         | 25.77 (1.82) | 17.52 (1.59) | 624(92)                    | 30.97 (2.94) | 24.85 (3.04) |

**Table S5** Multiple Linear Regression Model (MLRM) outputs of *Pinus canariensis* throughout the thinning treatments (CN, control North side; MTN, moderate thinning North side; HTN, heavy thinning North side, CS, control South side; MTS, moderate thinning South side; HTS, heavy thinning South side) at Tenerife (Canarian Islands, Spain). As fixed effects, we included estimated variables: time (year), precipitation (prcp), mean temperature (temp) and standardized BAIs (Growth index) was fitted as the response variable projections derived from model IPSL.CM5A-MR across two RCP scenarios (2.6 and 4.5).

| RCP 2.6      |                                                                          | RCP 4.5      |                                                                             |
|--------------|--------------------------------------------------------------------------|--------------|-----------------------------------------------------------------------------|
| IPSL-CM5A-MR |                                                                          | IPSL-CM5A-MR |                                                                             |
| plot         | equation                                                                 | plot         | equation                                                                    |
| CN           | GI= -4.071e+00+ (4.229e-03*year) + (-1.784e-01*temp) + (-3.812e-01*prcp) | CN           | GI= 6.646e+00+ (-3.957e-03*year) + (1.104e-01*temp) + (4.786e-01*prcp)      |
| MTN          | GI= -1.830e+00+ (2.893e-03*year) + (-1.866e-01*temp) + (4.644e-01*prcp)  | MTN          | GI= 1.053e+01+ (-6.385e-03*year) + (1.344e-01*temp) + (1.283e+00*prcp)      |
| HTN          | GI= 1.571e+00+ (4.647e-04*year) + (-1.160e-01*temp) + (8.009e-01*prcp)   | HTN          | GI= -7.585e-02 + (6.912e-04 *year) + (-4.190e-02 *temp) + (6.019e-01 *prcp) |
| CS           | GI= 2.248e+00+ (3.409e-04*year) + (-1.279e-01*temp) + (4.755e-01*prcp)   | CS           | GI= 1.617e+01+ (-1.022e-02*year) + (2.578e-01*temp) + (1.103e+00*prcp)      |
| MTS          | GI= -2.489e-02+ (1.114e-03*year) + (-7.969e-02*temp) + (2.815e-01*prcp)  | MTS          | GI= 1.396e+01+ (-9.582e-03*year) + (3.217e-01*temp) + (8.285e-01*prcp)      |
| HTS          | GI= -2.788e+00+ (3.735e-03*year) + (-2.124e-01*temp) + (6.043e-02*prcp)  | HTS          | GI= 1.119e+01+ (-6.860e-03*year) + (1.641e-01*temp) + (9.475e-01*prcp)      |

$$Y_t = c + \beta_1 X_1 + \beta_2 X_2 + \beta_3 X_3 \dots + \beta_n X_n$$

**Table S6** Multiple Linear Regression Model (MLRM) outputs. Asterisks indicate significant slopes of the regression lines (\*  $p < 0.5$ , \*\*  $p < 0.01$ , \*\*\* $p < 0.001$ )

| RCP 2.6      |          |            |         |            | RCP 4.5     |          |            |         |           |
|--------------|----------|------------|---------|------------|-------------|----------|------------|---------|-----------|
| IPSL-CM5A-MR |          |            |         |            |             |          |            |         |           |
|              | estimate | Std. error | T value | Pr (>t)    |             | estimate | Std. error | T value | Pr (>t)   |
| Intercept    | -0.8214  | 0.2941     | -2.793  | 0.005***   | Intercept   | 9.8266   | 0.4040     | 24.320  | <0.001*** |
| Year         | 0.0021   | 0.0001     | 12.184  | <0.001***  | Year        | -0.0061  | 0.0003     | -20.441 | <0.001*** |
| Tmed         | -0.1501  | 0.0136     | -11.010 | <0.001***  | Tmed        | 0.1620   | 0.0177     | 9.128   | <0.001*** |
| Prcp         | 0.2834   | 0.0748     | 3.786   | 0.00016*** | Prcp        | 0.9132   | 0.0967     | 9.440   | <0.001*** |
| R2           |          | 0.2434     |         |            | R2          |          | 0.4843     |         |           |
| Adjusted R2  |          | 0.24       |         |            | Adjusted R2 |          | 0.482      |         |           |
| P value      |          | <0.001***  |         |            | P value     |          | <0.001***  |         |           |



**Table S7.** Forest attributes of the *Pinus canariensis* stands at Tenerife (Canarian Islands, Spain) and growth ( $\text{m}^3 \text{ha}^{-1} \text{year}^{-1}$ ) under climatic scenarios (IPSL-CM5 Earth System Model-ESM, RCP 2.6 and 4.5, [42]). Abbreviations: H=average height, N=tree density, G=basal area, dbh=diameter at breast height. Values are means  $\pm$  SD (in brackets).

| Aspect       |                | H (m)                                                   | N (trees $\text{ha}^{-1}$ ) | G ( $\text{m}^2 \text{ha}^{-1}$ ) | dbh (cm)    | IPSL-2.5-2040     | IPSL-2.5-2060     | IPSL-4.5-2040     | IPSL-4.5-2060     |
|--------------|----------------|---------------------------------------------------------|-----------------------------|-----------------------------------|-------------|-------------------|-------------------|-------------------|-------------------|
|              |                | Growth ( $\text{m}^3 \text{ha}^{-1} \text{year}^{-1}$ ) |                             |                                   |             |                   |                   |                   |                   |
| Windward (N) | High density   | 20.10(0.45)                                             | 553.64(0.45)                | 33.35(0.45)                       | 28.25(0.45) | <b>8.34(0.47)</b> | <b>7.98(0.47)</b> | <b>6.11(0.47)</b> | <b>5.75(0.48)</b> |
|              | Middle density | 19.14(0.20)                                             | 387.57(0.20)                | 25.65(0.20)                       | 28.72(0.20) | 7.74(0.21)        | 7.08(0.20)        | 5.55(0.20)        | 4.60(0.21)        |
|              | Low density    | 14.61(0.28)                                             | 177.12(0.28)                | 10.53(0.28)                       | 26.33(0.28) | 4.84(0.29)        | 4.44(0.29)        | 5.09(0.29)        | 4.89(0.29)        |
| Leeward (S)  | High density   | 19.29(0.33)                                             | 548.69(4.05)                | 32.15(0.54)                       | 27.41(0.28) | <b>6.87(0.07)</b> | 6.24(0.14)        | <b>4.46(0.13)</b> | 3.47(0.09)        |
|              | Middle density | 17.79(0.32)                                             | 383.98(4.34)                | 24.09(0.59)                       | 27.62(0.29) | 6.83(0.07)        | <b>6.56(0.12)</b> | 4.44(0.11)        | <b>3.85(0.13)</b> |
|              | Low density    | 11.82(0.35)                                             | 166.29(5.61)                | 8.03(0.40)                        | 22.83(0.48) | 3.96(0.13)        | 3.63(0.12)        | 3.11(0.12)        | 2.81(0.08)        |
